# Supplementary material
Source: MDPI journal article supplement (https://www.mdpi.com/1999-4907/14/6/1256)
Supplement: s1 [file s1]

Supplementary Materials:

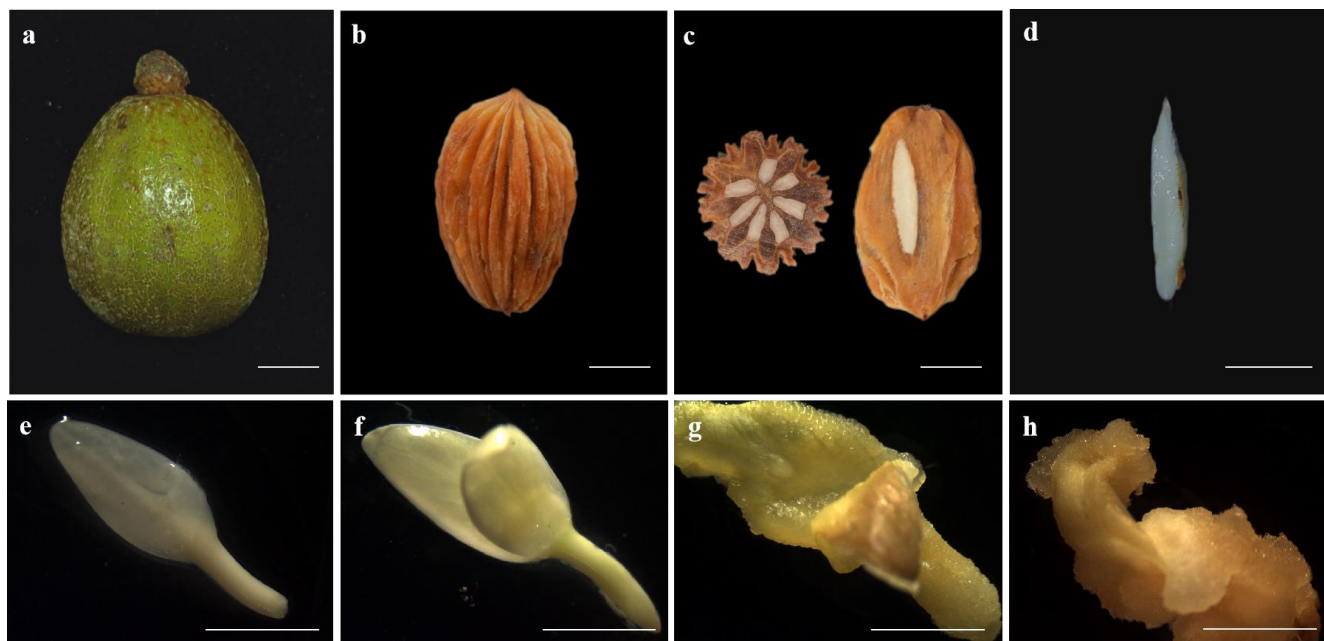

Figure S1: Seed structure and callus induction of *D. involucrata*: (a) Immature *D. involucrata* seeds. (b) Lignified seeds without exocarp and mesocarp. (c) Cross and vertical cutting of seeds. (d) Immature zygotic embryo surrounded by endosperm. (e~h) immature zygotic embryo 0 d, 5 d, 10 d, 15 d. Bar: 1 cm;

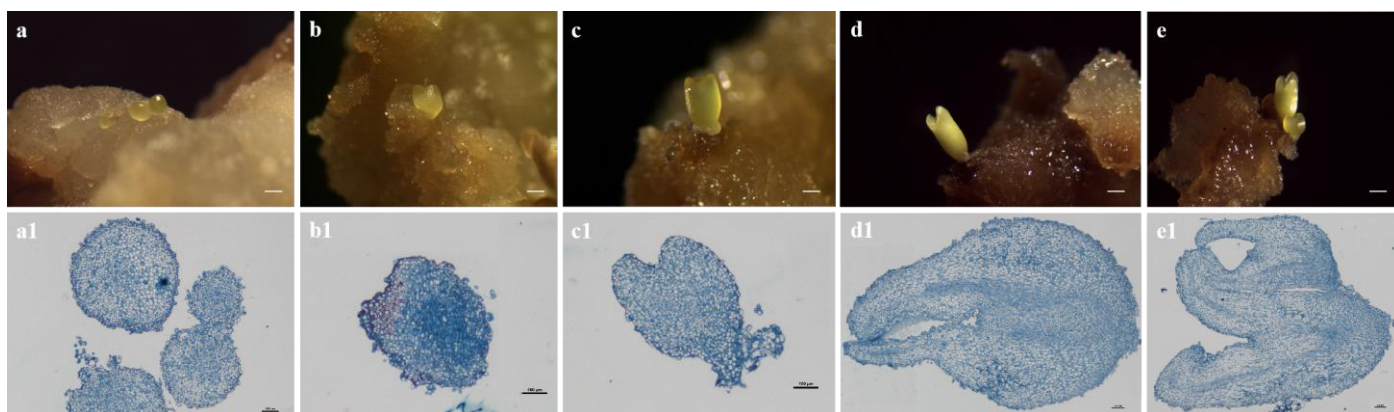

Figure S2: Different developmental stages and histology of somatic embryos from *D. involucrata*. (a,a1) Globular stage somatic embryo. (b,b1) Heart-shaped stage somatic embryo. (c,c1) Torpedo-shaped stage somatic embryo. (d,d1) Cotyledonary stage somatic embryo. (e,e1) Mature somatic embryo. (a~e) Bar: 1 mm. (a1~e1) Bar: 100  $\mu$ m;

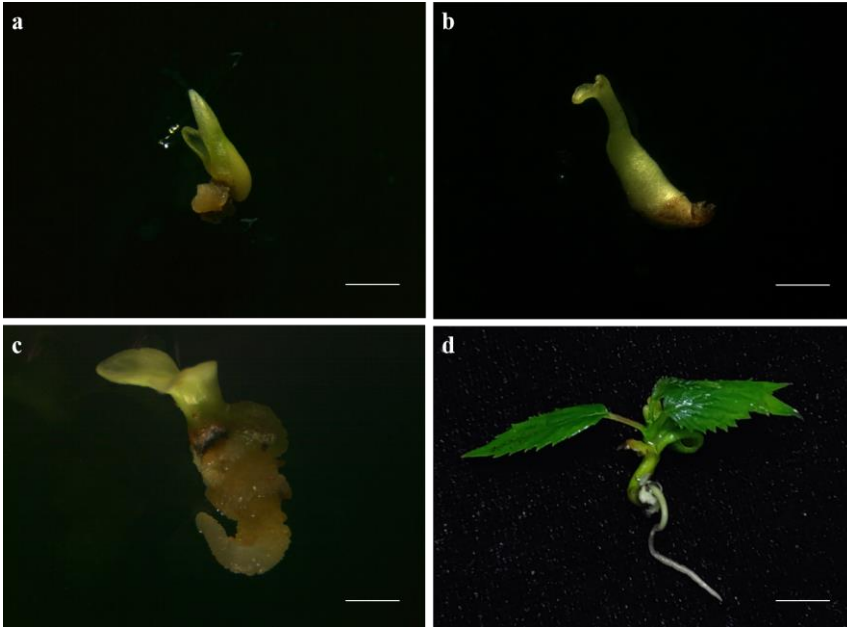

Figure S3: Somatic embryo germination and conversion of *D. involucrata*. (a) Anomalous germinated somatic embryo with cotyledons only. (b) Anomalous germinated somatic embryo with root only. (c) Normally germinated somatic embryo with both shoot and root. (d) Conversion plantlets. (a~c) Bar: 1 mm. (d) Bar: 1cm;

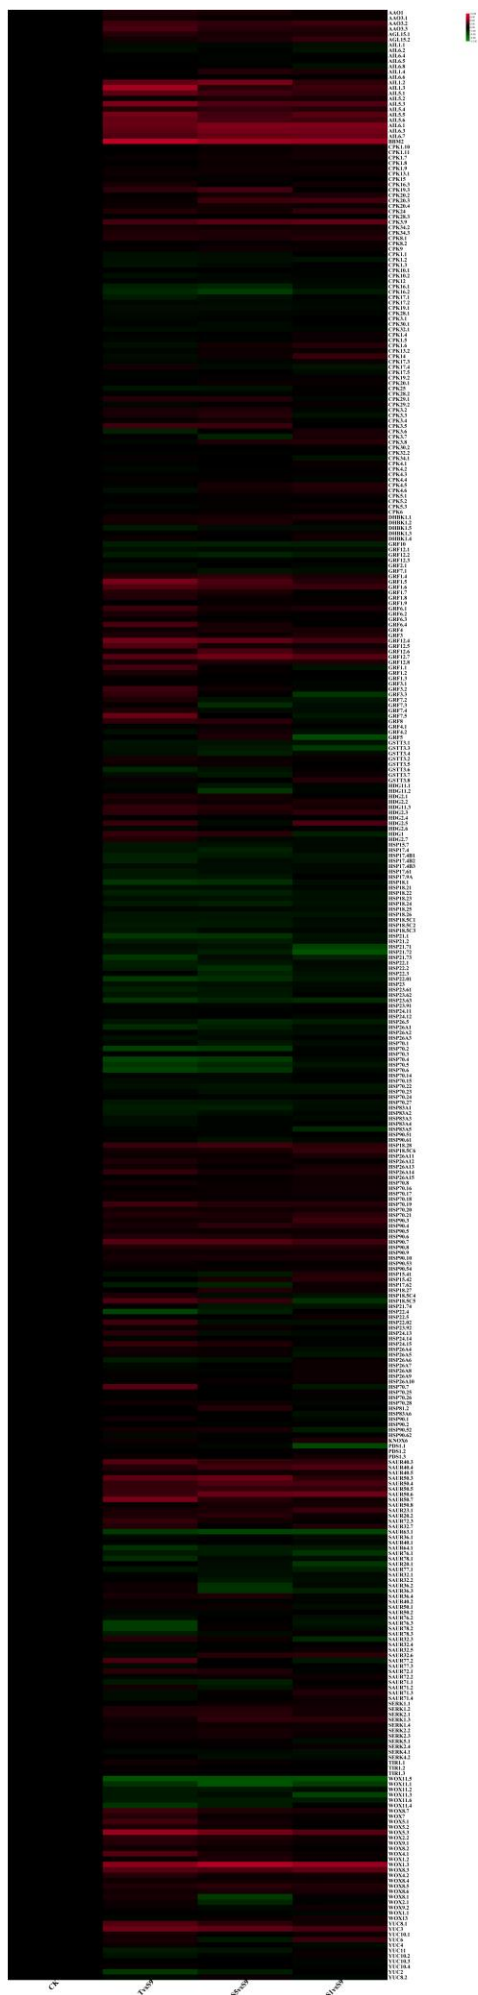

Figure S4: Genes associated with somatic embryogenesis from EC of *D. involucrata*;

Table S1: qRT-PCR primer design;

| Gene           | Forward primers      | Reverse primers     |
|----------------|----------------------|---------------------|
| <i>DiPRU1</i>  | CAGGATTAGCCAAGAGGT   | GGCGAAGGCAGCCATTAC  |
| <i>DiPHI1</i>  | TCAACGACATTCTCCACC   | CACCCACTCCATTTTACA  |
| <i>DiHIP21</i> | GTGTCTTGCCAAACTCCA   | ACCTTCATTATCCCTACCA |
| <i>DiASPA1</i> | TCAGTGGCATCACCGTTT   | ACCCGCAAGGTCCATCAT  |
| <i>DiGOLS1</i> | GAGCCCTAAAGCACTCCACA | GGCGAATCCCACCCTACCT |
| <i>DiIAA9</i>  | TGGTTGTCAGGTGGATAG   | TTTGCGTAAAGTGAAGAGT |
| <i>DiKWL1</i>  | CTTGAGGGGCATAAGGATAA | ATGGACTGTGATGGCTGTG |
| <i>DiASPA2</i> | CAGGCGGACTGCTATTGT   | AAACTTGGGAGTGAAACC  |
| <i>DiEP1</i>   | TTTGTTGGCAGTGTTGGT   | CCGTTTAGGCTTTGTTTC  |
| <i>DiFB60</i>  | GGGTTTGCTCACAGGGAT   | GCCGTGGAAGTTGAAGGA  |
| <i>DiPGKH</i>  | CTTGCCACTAAGGTCTGC   | GGATGGTTGGATGGGATT  |
| <i>DiRG1</i>   | GGTCACGAAGGGCTCTAT   | GAAACTCGGTCTAAATGC  |
| <i>DiCSE</i>   | ACCTCCCCAAACACCAAATC | CCGCCAGCAAGGACAAGA  |
| <i>DiKALSE</i> | GAGTCGTCGCTGGTGAGA   | CGTGTCGGGTGTTTGTGA  |
| <i>DiACX3</i>  | TGAGGGTAGAACTTGTGAGC | ATGCCGTGAAGCCTGTGG  |
| <i>DiCAN2</i>  | TAAACAAGGACTCCCAAACA | AGAGGCAGACGCAATACA  |

Table S2: Reverse transcription reaction system;

| Procedure                          | Reagents name                             | Volume                                                        |
|------------------------------------|-------------------------------------------|---------------------------------------------------------------|
| Removal of Genomic DNA<br>Reaction | 5 × gDNA Emaser Buffer                    | 2 µl                                                          |
|                                    | gDNA Emaser                               | 1 µl                                                          |
|                                    | Total RNA                                 | Calculated according to the concentration, not to exceed 1 µg |
|                                    | RNase Free ddH <sub>2</sub> O             | Up to 10 µl                                                   |
| Reverse transcription reaction     | The product obtained in the previous step | 10 µl                                                         |
|                                    | RNase Free ddH <sub>2</sub> O             | 4 µl                                                          |
|                                    | 5 × PrimeScript Buffer 2                  | 4 µl                                                          |
|                                    | RT Primer Mix                             | 1 µl                                                          |
|                                    | PrimeScript RT Enzyme Mix I               | 1 µl                                                          |

Table S3: Reverse transcriptional response program;

| Procedure                       | Temperature | Time   |
|---------------------------------|-------------|--------|
| Removal of Genomic DNA Reaction | 42 °C       | 2 min  |
| Reverse transcription reaction  | 42 °C       | 15 min |
|                                 | 85 °C       | 5 s    |

Table S4: qRT-PCR reaction system;

| Reagents Name                  | Volume |
|--------------------------------|--------|
| 2 × Q3 SYBR qRT-PCR Master Mix | 10 µl  |
| RNase Free ddH <sub>2</sub> O  | 8 µl   |
| Primer F                       | 0.5 µl |
| Primer R                       | 0.5 µl |
| cDNA                           | 1 µl   |

Table S5: qRT-PCR procedure.

| Procedure       | Reaction temperature | Reaction time | Number of cycles |
|-----------------|----------------------|---------------|------------------|
| pre-denatured   | 95 °C                | 60 s          | 1                |
|                 | 95 °C                | 10 s          |                  |
| cyclic reaction | 57 °C                | 10 s          | 40               |
|                 | 72 °C                | 30 s          |                  |
|                 | 95 °C                | 15 s          |                  |
| melting curve   | 65 °C                | 60 s          | 1                |
|                 | 95 °C                | 15 s          |                  |
| cool down       | 37 °C                | 30 s          | 1                |
